# Supplementary material for: Suicide Thoughts and Attempts and Psychiatric Treatment Utilization: Informing Prevention Strategies
Source: Atypon-hosted journal article supplement (doi:10.1176/appi.ps.201100159), 2012-02-01
Supplement: pss6302_0186_ds.pdf [file pss6302_0186_ds.pdf]

## Appendix

Table A: Sociodemographic characteristics of suicide thoughts and attempts in the National Survey on Drug Use and Health, 2008-2009

|                    | Suicide Thoughts |        |      |              | Suicide Plans |        |      |             | Suicide Attempts |        |      |             |
|--------------------|------------------|--------|------|--------------|---------------|--------|------|-------------|------------------|--------|------|-------------|
|                    | %                | n      | OR   | 95% CI       | %             | n      | OR   | 95% CI      | %                | n      | OR   | 95% CI      |
| Sex                |                  |        |      |              |               |        |      |             |                  |        |      |             |
| Male               | 3.6              | 35,248 | 0.92 | 0.83 - 1.01  | 1.0           | 35,248 | 0.94 | 0.79 - 1.11 | 0.4              | 35,244 | 0.83 | 0.61 - 1.12 |
| Female             | 3.9              | 40,442 | 1.00 |              | 1.1           | 40,440 | 1.00 |             | 0.5              | 40,440 | 1.00 |             |
| Age                |                  |        |      |              |               |        |      |             |                  |        |      |             |
| 18-25              | 6.5              | 37,989 | 1.00 |              | 1.9           | 37,988 | 1.00 |             | 1.2              | 37,986 | 1.00 |             |
| 26-34              | 4.1              | 11,157 | 0.62 | 0.55 - 0.71  | 1.0           | 11,156 | 0.50 | 0.40 - 0.64 | 0.5              | 11,156 | 0.44 | 0.32 - 0.61 |
| 35+                | 3.1              | 26,544 | 0.46 | 0.41 - 0.51  | 0.8           | 26,544 | 0.43 | 0.35 - 0.52 | 0.3              | 26,542 | 0.27 | 0.20 - 0.37 |
| Race/Ethnicity     |                  |        |      |              |               |        |      |             |                  |        |      |             |
| White, non-Hisp.   | 4.0              | 48,090 | 1.00 |              | 1.1           | 48,089 | 1.00 |             | 0.5              | 48,088 | 1.00 |             |
| Black, non-Hisp.   | 3.4              | 9,352  | 0.85 | 0.74 - 0.97  | 0.9           | 9,352  | 0.83 | 0.64 - 1.08 | 0.6              | 9,351  | 1.36 | 0.96 - 1.92 |
| Hispanic           | 2.9              | 11,879 | 0.73 | 0.62 - 0.86  | 0.9           | 11,879 | 0.78 | 0.55 - 1.11 | 0.5              | 11,878 | 0.98 | 0.68 - 1.42 |
| Asian/Pac. Is.     | 2.1              | 2,895  | 0.53 | 0.39 - 0.71  | 0.3           | 2,895  | 0.30 | 0.17 - 0.55 | 0.3              | 2,895  | 0.62 | 0.21 - 1.81 |
| Other              | 6.4              | 3,474  | 1.66 | 1.14 - 2.42  | 1.9           | 3,473  | 1.80 | 1.09 - 2.97 | 1.1              | 3,472  | 2.44 | 1.28 - 4.65 |
| Marital Status     |                  |        |      |              |               |        |      |             |                  |        |      |             |
| Married            | 2.3              | 27,046 | 1.00 |              | 0.6           | 27,046 | 1.00 |             | 0.2              | 27,046 | 1.00 |             |
| Previously Married | 5.0              | 8,500  | 2.19 | 1.86 - 2.57  | 1.3           | 8,500  | 2.43 | 1.72 - 3.42 | 0.6              | 8,500  | 2.76 | 1.72 - 4.44 |
| Never Married      | 5.8              | 40,144 | 2.59 | 2.289 - 2.94 | 1.8           | 40,142 | 3.18 | 2.54 - 3.99 | 0.9              | 40,138 | 4.00 | 2.74 - 5.83 |
| Education          |                  |        |      |              |               |        |      |             |                  |        |      |             |
| < High school      | 4.0              | 13,036 | 1.00 |              | 1.2           | 13,036 | 1.00 |             | 0.7              | 13,036 | 1.00 |             |
| High school        | 4.1              | 25,120 | 1.03 | 0.89 - 1.21  | 1.0           | 25,119 | 0.83 | 0.65 - 1.05 | 0.5              | 25,117 | 0.74 | 0.55 - 0.99 |
| Some college       | 4.2              | 21,946 | 1.07 | 0.90 - 1.27  | 1.2           | 21,945 | 1.01 | 0.76 - 1.34 | 0.6              | 21,944 | 0.78 | 0.51 - 1.21 |
| College            | 2.8              | 15,588 | 0.70 | 0.59 - 0.83  | 0.7           | 15,588 | 0.57 | 0.42 - 0.77 | 0.2              | 15,587 | 0.28 | 0.17 - 0.48 |
| Health Insurance   |                  |        |      |              |               |        |      |             |                  |        |      |             |
| Yes                | 3.5              | 59,294 | 0.69 | 0.60 - 0.79  | 1.0           | 59,292 | 0.67 | 0.54 - 0.83 | 0.4              | 59,290 | 0.58 | 0.42 - 0.80 |

|                        |      |        |       |               |     |        |       |               |     |        |       |               |
|------------------------|------|--------|-------|---------------|-----|--------|-------|---------------|-----|--------|-------|---------------|
| No                     | 5.0  | 16,396 | 1.00  |               | 1.4 | 16,396 | 1.00  |               | 0.8 | 16,394 | 1.00  |               |
| Psychological Distress |      |        |       |               |     |        |       |               |     |        |       |               |
| Yes                    | 22.0 | 11,064 | 17.22 | 15.01 - 19.76 | 7.4 | 11,063 | 28.57 | 22.26 - 36.67 | 3.4 | 11,060 | 24.28 | 17.49 - 33.70 |
| No                     | 1.6  | 64,626 | 1.00  |               | 0.3 | 64,625 | 1.00  |               | 0.1 | 64,624 | 1.00  |               |
| Overall Health         |      |        |       |               |     |        |       |               |     |        |       |               |
| Excellent              | 1.8  | 19,538 | 1.00  |               | 0.4 | 19,537 | 1.00  |               | 0.2 | 19,537 | 1.00  |               |
| Very Good              | 3.1  | 29,236 | 1.77  | 1.47 - 2.12   | 0.8 | 29,236 | 1.86  | 1.26 - 2.76   | 0.3 | 29,234 | 1.69  | 1.10 - 2.61   |
| Good                   | 4.4  | 19,744 | 2.55  | 2.09 - 3.11   | 1.2 | 19,744 | 2.87  | 1.73 - 4.75   | 0.6 | 19,744 | 2.98  | 1.98 - 4.48   |
| Fair/Poor              | 7.5  | 7,159  | 4.46  | 3.56 - 5.60   | 2.4 | 7,158  | 5.79  | 3.86 - 8.68   | 1.1 | 7,156  | 5.30  | 3.14 - 8.95   |

Table A shows the estimated weighted percent of suicidal thoughts, plans, and attempts by sociodemographic category for the full sample, including unadjusted, bi-variable logistic regression analyses. Overall, individuals who were in the youngest age group (18-25 year olds), were never married, were without health insurance, experienced psychological distress, and had lower overall health had the greatest odds of suicide thoughts, plans, and attempts. Individuals who were white/non-Hispanic experienced more suicidal thoughts than all groups except the other race/ethnicity group, who had the highest levels. These differences between the white/non-Hispanic group and other race/ethnicity groups did not persist for suicidal plans and attempts, except that the other race/ethnicity group had higher levels of suicide thoughts, plans, and attempts and those who were Asian/Pacific Islanders had lower levels of

suicide plans. Individuals with a college degree had suicidal thoughts, plans, and attempts less often than those without a high school diploma. There were no differences based on sex.

| Table B: Psychiatric treatment utilization among individuals with suicide thoughts, plans, and attempts in the National Survey on Drug Use and Health, 2008-2009 |                  |       |              |       |                 |     |
|------------------------------------------------------------------------------------------------------------------------------------------------------------------|------------------|-------|--------------|-------|-----------------|-----|
|                                                                                                                                                                  | Suicide Thoughts |       | Suicide Plan |       | Suicide Attempt |     |
|                                                                                                                                                                  | %                | n     | %            | n     | %               | n   |
| Any Specialty Psychiatric Treatment                                                                                                                              | 51.7             | 4,116 | 64.1         | 1,218 | 65.9            | 666 |
| Any Alcohol or Drug Treatment                                                                                                                                    | 7.5              | 4,116 | 10.7         | 1,218 | 13.2            | 666 |
| Alcohol Treatment                                                                                                                                                | 5.1              | 4,116 | 6.4          | 1,218 | 10.1            | 666 |
| Drug Treatment                                                                                                                                                   | 3.9              | 4,116 | 6.5          | 1,218 | 7.0             | 666 |
| Any Mental Health Treatment                                                                                                                                      | 49.3             | 4,095 | 61.6         | 1,211 | 63.1            | 659 |
| Inpatient Mental Health Treatment                                                                                                                                | 8.9              | 4,115 | 21.1         | 1,217 | 32.5            | 665 |
| Outpatient Mental Health Treatment                                                                                                                               | 33.0             | 4,082 | 48.1         | 1,207 | 49.0            | 655 |
| Psychiatric Medication Treatment                                                                                                                                 | 44.1             | 4,114 | 56.1         | 1,217 | 56.8            | 664 |

Table B shows the past-year specialty psychiatric treatment utilization patterns among individuals with suicide thoughts, plans, and attempts. Non-receipt of specialty psychiatric treatment was common across all non-fatal suicide categories. Mental health treatment utilization was more common than drug or alcohol treatment among individuals with past year suicide thoughts, plans, or attempts. Fewer than 9% of those with suicide thoughts and 33% who attempted suicide received inpatient mental health treatment.
